# Supplementary material for: Activation of the yeast Retrograde Response pathway by adaptive laboratory evolution with S-(2-aminoethyl)-L-cysteine reduces ethanol and increases glycerol during winemaking
Source: PubMed Central journal article supplement (PMC11337681; doi:10.1186/s12934-024-02504-z), 2024-08-20
Supplement: 12934_2024_2504_MOESM1_ESM.pdf [file 12934_2024_2504_MOESM1_ESM.pdf]

**Additional file 1.** List of the strains used in this study.

| <b>Yeast Strain</b> | <b>Genotype / Plasmid added</b>                              | <b>Source</b>         |
|---------------------|--------------------------------------------------------------|-----------------------|
| MAE                 | MAE                                                          | Lallemand             |
| MAE <i>mks1</i> Δ   | MAE CRISPR/Cas9 <i>mks1</i> Δ                                | Garrigós et al., 2023 |
| eMAE 8-1a           | MAE evolved in SD+AEC after 8 transfers, culture 1 colony a  | This study            |
| eMAE 8-1b           | MAE evolved in SD+AEC after 8 transfers, culture 1 colony b  | This study            |
| eMAE 8-1c           | MAE evolved in SD+AEC after 8 transfers, culture 1 colony c  | This study            |
| eMAE 8-1d           | MAE evolved in SD+AEC after 8 transfers, culture 1 colony d  | This study            |
| eMAE 8-1e           | MAE evolved in SD+AEC after 8 transfers, culture 1 colony e  | This study            |
| eMAE 8-2a           | MAE evolved in SD+AEC after 8 transfers, culture 2 colony a  | This study            |
| eMAE 8-2b           | MAE evolved in SD+AEC after 8 transfers, culture 2 colony b  | This study            |
| eMAE 8-2c           | MAE evolved in SD+AEC after 8 transfers, culture 2 colony c  | This study            |
| eMAE 8-2d           | MAE evolved in SD+AEC after 8 transfers, culture 2 colony d  | This study            |
| eMAE 8-2e           | MAE evolved in SD+AEC after 8 transfers, culture 2 colony e  | This study            |
| eMAE 29-1a          | MAE evolved in SD+AEC after 29 transfers, culture 1 colony a | This study            |
| eMAE 29-1b          | MAE evolved in SD+AEC after 29 transfers, culture 1 colony b | This study            |
| eMAE 29-1c          | MAE evolved in SD+AEC after 29 transfers, culture 1 colony c | This study            |
| eMAE 29-1d          | MAE evolved in SD+AEC after 29 transfers, culture 1 colony d | This study            |
| eMAE 29-1e          | MAE evolved in SD+AEC after 29 transfers, culture 1 colony e | This study            |
| eMAE 29-2a          | MAE evolved in SD+AEC after 29 transfers, culture 2 colony a | This study            |
| eMAE 29-2b          | MAE evolved in SD+AEC after 29 transfers, culture 2 colony b | This study            |
| eMAE 29-2c          | MAE evolved in SD+AEC after 29 transfers, culture 2 colony c | This study            |
| eMAE 29-2d          | MAE evolved in SD+AEC after 29 transfers, culture 2 colony d | This study            |
| eMAE 29-2e          | MAE evolved in SD+AEC after 29 transfers, culture 2 colony e | This study            |
| TAE                 | TAE                                                          | Lallemand             |

|                   |                                                    |                       |
|-------------------|----------------------------------------------------|-----------------------|
| TAE <i>mks1</i> Δ | TAE CRISPR/Cas9 <i>mks1</i> Δ                      | Garrigós et al., 2023 |
| eTAE 8a           | TAE evolved in SD+AEC after 8 transfers, colony a  | This study            |
| eTAE 8b           | TAE evolved in SD+AEC after 8 transfers, colony b  | This study            |
| eTAE 8c           | TAE evolved in SD+AEC after 8 transfers, colony c  | This study            |
| eTAE 8d           | TAE evolved in SD+AEC after 8 transfers, colony d  | This study            |
| eTAE 8e           | TAE evolved in SD+AEC after 8 transfers, colony e  | This study            |
| eTAE 29b          | TAE evolved in SD+AEC after 29 transfers, colony b | This study            |
| eTAE 29d          | TAE evolved in SD+AEC after 29 transfers, colony d | This study            |
| eTAE 29l          | TAE evolved in SD+AEC after 29 transfers, colony l | This study            |
| eTAE 29q          | TAE evolved in SD+AEC after 29 transfers, colony q | This study            |
| eTAE 29t          | TAE evolved in SD+AEC after 29 transfers, colony t | This study            |
| EAE               | EAE                                                | Lallemant             |
| EAE <i>mks1</i> Δ | EAE CRISPR/Cas9 <i>mks1</i> Δ                      | Garrigós et al., 2023 |
| eEAE 8a           | EAE evolved in SD+AEC after 8 transfers, colony a  | This study            |
| eEAE 8b           | EAE evolved in SD+AEC after 8 transfers, colony b  | This study            |
| eEAE 8c           | EAE evolved in SD+AEC after 8 transfers, colony c  | This study            |
| eEAE 8d           | EAE evolved in SD+AEC after 8 transfers, colony d  | This study            |
| eEAE 8e           | EAE evolved in SD+AEC after 8 transfers, colony e  | This study            |
| eEAE 29j          | EAE evolved in SD+AEC after 29 transfers, colony j | This study            |
| eEAE 29k          | EAE evolved in SD+AEC after 29 transfers, colony k | This study            |
| eEAE 29n          | EAE evolved in SD+AEC after 8 transfers, colony n  | This study            |
| eEAE 29o          | EAE evolved in SD+AEC after 29 transfers, colony o | This study            |
| eEAE 29s          | EAE evolved in SD+AEC after 29 transfers, colony s | This study            |
| C9                | C9 Mat a <i>ho::loxP</i>                           | Walker et al., 2003   |
| C9 <i>lys20</i> Δ | C9 <i>lys20::loxP</i>                              | This study            |

|                                         |                                                                     |            |
|-----------------------------------------|---------------------------------------------------------------------|------------|
| C9 <i>lys21</i> Δ                       | C9 <i>lys21::loxP</i>                                               | This study |
| C9 <i>lys20</i> Δ <i>lys21</i> Δ        | C9 <i>lys20::loxP lys21::loxP</i>                                   | This study |
| C9 <i>rtg2</i> Δ                        | C9 <i>rtg2::loxP</i>                                                | This study |
| C9 vector                               | C9 with plasmid pCUP1pNuiHA kanMX CEN                               | This study |
| C9 pLYS21 – MAE                         | C9 with plasmid pLYS21 – MAE                                        | This study |
| C9 pLYS21 – eMAE 8-1b                   | C9 with plasmid pLYS21 – eMAE 8-1b                                  | This study |
| C9 pLYS21 – TAE                         | C9 with plasmid pLYS21 – TAE                                        | This study |
| C9 pLYS21 – eTAE 29I                    | C9 with plasmid pLYS21 – eTAE 29I                                   | This study |
| C9 pLYS20 – EAE                         | C9 with plasmid pLYS20 – EAE                                        | This study |
| C9 pLYS20 – eEAE 29j                    | C9 with plasmid pLYS21 – eEAE 29j                                   | This study |
| C9 pRTG2 – MAE                          | C9 with plasmid pRTG2 – MAE                                         | This study |
| C9 pRTG2 – eMAE 29-2c                   | C9 with plasmid pRTG2 – eMAE 29-2c                                  | This study |
| C9 pRTG2 – TAE                          | C9 with plasmid pRTG2 – TAE                                         | This study |
| C9 pRTG2 – eTAE 29I                     | C9 with plasmid pRTG2 – eTAE 29I                                    | This study |
| C9 <i>lys20</i> Δ vector                | C9 <i>lys20</i> Δ with plasmid pCUP1pNuiHA kanMX CEN                | This study |
| C9 <i>lys20</i> Δ pLYS20 – EAE          | C9 <i>lys20</i> Δ with plasmid pLYS20 – EAE                         | This study |
| C9 <i>lys20</i> Δ pLYS20 – eEAE 29j     | C9 <i>lys20</i> Δ with plasmid pLYS20 – eEAE 29j                    | This study |
| C9 <i>lys21</i> Δ vector                | C9 <i>lys21</i> Δ with plasmid pCUP1pNuiHA kanMX CEN                | This study |
| C9 <i>lys21</i> Δ pLYS21 – MAE          | C9 <i>lys21</i> Δ with plasmid pLYS21 – MAE                         | This study |
| C9 <i>lys21</i> Δ pLYS21 – eMAE 8-1b    | C9 <i>lys21</i> Δ with plasmid pLYS21 – eMAE 8-1b                   | This study |
| C9 <i>lys21</i> Δ pLYS21 – TAE          | C9 <i>lys21</i> Δ with plasmid pLYS21 – TAE                         | This study |
| C9 <i>lys21</i> Δ pLYS21 – eTAE 29I     | C9 <i>lys21</i> Δ with plasmid pLYS21 – eTAE 29I                    | This study |
| C9 <i>lys20</i> Δ <i>lys21</i> Δ vector | C9 <i>lys20</i> Δ <i>lys21</i> Δ with plasmid pCUP1pNuiHA kanMX CEN | This study |

|                                                        |                                                                     |            |
|--------------------------------------------------------|---------------------------------------------------------------------|------------|
| C9 <i>lys20</i> Δ <i>lys21</i> Δ<br>pLYS20 – EAE       | C9 <i>lys20</i> Δ <i>lys21</i> Δ with plasmid pLYS20<br>– EAE       | This study |
| C9 <i>lys20</i> Δ <i>lys21</i> Δ<br>pLYS20 – eEAE 29j  | C9 <i>lys20</i> Δ <i>lys21</i> Δ with plasmid pLYS20<br>– eEAE 29j  | This study |
| C9 <i>lys20</i> Δ <i>lys21</i> Δ<br>pLYS21 – MAE       | C9 <i>lys20</i> Δ <i>lys21</i> Δ with plasmid pLYS21<br>– MAE       | This study |
| C9 <i>lys20</i> Δ <i>lys21</i> Δ<br>pLYS21 – eMAE 8-1b | C9 <i>lys20</i> Δ <i>lys21</i> Δ with plasmid pLYS21<br>– eMAE 8-1b | This study |
| C9 <i>lys20</i> Δ <i>lys21</i> Δ<br>pLYS21 – TAE       | C9 <i>lys20</i> Δ <i>lys21</i> Δ with plasmid pLYS21<br>– TAE       | This study |
| C9 <i>lys20</i> Δ <i>lys21</i> Δ<br>pLYS21 – eTAE 29l  | C9 <i>lys20</i> Δ <i>lys21</i> Δ with plasmid pLYS21<br>– eTAE 29l  | This study |
| C9 <i>rtg2</i> Δ vector                                | C9 <i>rtg2</i> Δ with plasmid pCUP1pNuiHA<br>kanMX CEN              | This study |
| C9 <i>rtg2</i> Δ pRTG2 – MAE                           | C9 <i>rtg2</i> Δ with plasmid pRTG2 – MAE                           | This study |
| C9 <i>rtg2</i> Δ pRTG2 – eMAE<br>29-2c                 | C9 <i>rtg2</i> Δ with plasmid pRTG2 – eMAE<br>29-2c                 | This study |
| C9 <i>rtg2</i> Δ pRTG2 – TAE                           | C9 <i>rtg2</i> Δ with plasmid pRTG2 – TAE                           | This study |
| C9 <i>rtg2</i> Δ pRTG2 – eTAE<br>29l                   | C9 <i>rtg2</i> Δ with plasmid pRTG2 – eTAE<br>29l                   | This study |
