# Supplementary material for: Activation of the yeast Retrograde Response pathway by adaptive laboratory evolution with S-(2-aminoethyl)-L-cysteine reduces ethanol and increases glycerol during winemaking
Source: PubMed Central journal article supplement (PMC11337681; doi:10.1186/s12934-024-02504-z), 2024-08-20
Supplement: 12934_2024_2504_MOESM2_ESM.pdf [file 12934_2024_2504_MOESM2_ESM.pdf]

**Additional file 2.** Plasmids used in this work.

| Plasmid               | Description                                                                                | Source                                            |
|-----------------------|--------------------------------------------------------------------------------------------|---------------------------------------------------|
| pUG6                  | Multi-copy plasmid (loxP–kanMX–loxP disruption module, kanMX marker)                       | Güldener et al., 1996                             |
| pYEP-cre-cyh          | Multi-copy plasmid (GAL1-cre recombinase system, CYH marker)                               | Delneri et al., 2000                              |
| pCUP1pNuiHA kanMX CEN | Centromeric ARS plasmid (kanMX marker, ScCUP1 promoter)                                    | Gift from Nils Johnsson (Addgene plasmid #131168) |
| pLYS21 – MAE          | pCUP1pNuiHA kanMX CEN with <i>LYS21</i> gene from MAE parental strain                      | This study                                        |
| pLYS21 – eMAE 8-1b    | pCUP1pNuiHA kanMX CEN with <i>LYS21<sup>Y347H</sup></i> gene from eMAE 8-1b evolved strain | This study                                        |
| pLYS21 – TAE          | pCUP1pNuiHA kanMX CEN with <i>LYS21</i> gene from TAE parental strain                      | This study                                        |
| pLYS21 – eTAE 29I     | pCUP1pNuiHA kanMX CEN with <i>LYS21<sup>R390G</sup></i> gene from eTAE 29I evolved strain  | This study                                        |
| pLYS20 – EAE          | pCUP1pNuiHA kanMX CEN with <i>LYS20</i> gene from EAE parental strain                      | This study                                        |
| pLYS20 – eEAE 29j     | pCUP1pNuiHA kanMX CEN with <i>LYS20<sup>N379D</sup></i> gene from eEAE 29j evolved strain  | This study                                        |
| pRTG2 – MAE           | pCUP1pNuiHA kanMX CEN with <i>RTG2</i> gene from MAE parental strain                       | This study                                        |
| pRTG2 – eMAE 29-2c    | pCUP1pNuiHA kanMX CEN with <i>RTG2<sup>R30C</sup></i> gene from eMAE 29-2c evolved strain  | This study                                        |
| pRTG2 – TAE           | pCUP1pNuiHA kanMX CEN with <i>RTG2</i> gene from TAE parental strain                       | This study                                        |
| pRTG2 – eTAE 29I      | pCUP1pNuiHA kanMX CEN with <i>RTG2<sup>G248E</sup></i> gene from eTAE 29I evolved strain   | This study                                        |
