# Supplementary material for: Activation of the yeast Retrograde Response pathway by adaptive laboratory evolution with S-(2-aminoethyl)-L-cysteine reduces ethanol and increases glycerol during winemaking
Source: PubMed Central journal article supplement (PMC11337681; doi:10.1186/s12934-024-02504-z), 2024-08-20
Supplement: 12934_2024_2504_MOESM3_ESM.pdf [file 12934_2024_2504_MOESM3_ESM.pdf]

**Additional file 3.** Primers used in this work.

| <b>Primer</b>                     | <b>Sequence (5' – 3')</b>                                         | <b>Source and Use</b>    |
|-----------------------------------|-------------------------------------------------------------------|--------------------------|
| <b><i>Interdelta analysis</i></b> |                                                                   |                          |
| Delta-12                          | TCAACAATGGAATCCCAAC                                               | (Legras and Karst, 2003) |
| Delta-21                          | CATCTTAACACCGTATATGA                                              | (Legras and Karst, 2003) |
| <b><i>Gene deletions</i></b>      |                                                                   |                          |
| <i>LYS20a</i>                     | ATAACAAACAAAGGAAGGACCCTGTATTGTTTT<br>CCTAAAGTTCGTACGCTGCAGGTCGAC  | This study               |
| <i>LYS20b</i>                     | TGTAATAAGTGAAAGAACATAATGTAATGGTTT<br>GGGAACGATAGGCCACTAGTGGATCTG  | “ ”                      |
| <i>LYS20c</i>                     | TTTTAAGGGCCTCATCGCTG                                              | “ ”                      |
| <i>LYS20d</i>                     | TTAGAAAGATAGTCGCCCGG                                              | “ ”                      |
| <i>LYS20e</i>                     | GCATCACGGGAGAGTAAATC                                              | “ ”                      |
| <i>LYS21a</i>                     | CTTCTTGTTGCGTTTAGGCCTTTATTTTCGTACA<br>CATTTAATTCGTACGCTGCAGGTCGAC | “ ”                      |
| <i>LYS21b</i>                     | CGGTAATCGCCAGTACTTAAACACCTAATAACG<br>CCCAGTAATAGGCCACTAGTGGATCTG  | “ ”                      |
| <i>LYS21c</i>                     | CTTCTTGTTGCGTTTAGGCC                                              | “ ”                      |
| <i>LYS21d</i>                     | GTATCGAAGAATGCGTTGGC                                              | “ ”                      |
| <i>LYS21e</i>                     | ATAATAGCGTGGGGAATCGC                                              | “ ”                      |
| <i>RTG2a</i>                      | ATGTCAACACTTAGCGATAGTGATACC                                       | “ ”                      |
| <i>RTG2b</i>                      | TCACATACATAATCGTACCAATATACT                                       | “ ”                      |
| <i>RTG2c</i>                      | AGTCACATGACCGCGATAAG                                              | “ ”                      |
| <i>RTG2d</i>                      | TTCTTGCATGATGTGCAGCC                                              | “ ”                      |
| <i>RTG2e</i>                      | TAAACTGGTCTCCACCTCAC                                              | “ ”                      |
| K2                                | GGGACAATTCAACGCGTCTG                                              |                          |
| K3                                | CCTCGACATCATCTGCCC                                                |                          |
| <b><i>Cloning</i></b>             |                                                                   |                          |
| <i>LYS20-X</i>                    | TAAGCACTCGAGATTTGGTATACTGCGTGCGC                                  | This study               |
| <i>LYS20-B</i>                    | TGCTTAGGATCCTGAGCGTGCTAATGCTGAAC                                  | “ ”                      |
| <i>LYS20p</i>                     | TCTCGGTTGAGTAAACGCTC                                              | “ ”                      |
| <i>LYS20t</i>                     | TTGCTATCCCAAAGGAGTGC                                              | “ ”                      |
| <i>LYS21-X</i>                    | TAAGCACTCGAGGACGATGGTGAATCGTATGC                                  | “ ”                      |
| <i>LYS21-B</i>                    | TGCTTAGGATCCCCTGGTATTACGGGAAATGC                                  | “ ”                      |
| <i>LYS21p</i>                     |                                                                   | “ ”                      |
| <i>LYS21t</i>                     |                                                                   | “ ”                      |
| <i>RTG2-X</i>                     | TAAGCACTCGAGCGAGCTCAATAAGTGATCCG                                  | “ ”                      |
| <i>RTG2-B</i>                     | TGCTTAGGATCCAAGTCCGTTGGTATCATCGG                                  | “ ”                      |
| <i>RTG2p</i>                      | TGCTAACTTCTGCTGGGAAG                                              | “ ”                      |
| <i>RTG2t</i>                      | CGTCACGAATAAATCCCGTG                                              | “ ”                      |
| pCUP1p                            | ATTAATGCAGCTGGCACGAC                                              | “ ”                      |
| pCUP1t                            | TCTTTTCCGCTGAACCGTTC                                              | “ ”                      |
| <b><i>Plasmids sequencing</i></b> |                                                                   |                          |
| <i>LYS20f</i>                     | AGAGGTATATCCACTTCGCC                                              | This study               |
| <i>LYS20g</i>                     | AGTTCCGGTACATCGCTGTC                                              | “ ”                      |

|                |                            |                             |
|----------------|----------------------------|-----------------------------|
| <i>LYS2</i> 1f | GCACAAGATCAGAGACATCG       | “ ”                         |
| <i>LYS2</i> 1g | TGCCTTTTTAGAAACATGCCC      | “ ”                         |
| <i>RTG2</i> f  | CGATAGTGATACCGAGACTG       | “ ”                         |
| <i>RTG2</i> g  | GCACGCCAATTTTAACCCTC       | “ ”                         |
| pCUP1p         | ATTAATGCAGCTGGCACGAC       | “ ”                         |
| pCUP1t         | TCTTTTCCGCTGAACCGTTC       | “ ”                         |
| <b>qRT-PCR</b> |                            |                             |
| <i>ACT</i> 1f  | TCCCAGGTATTGCCGAAAGAATGC   | (Starovoytova et al., 2013) |
| <i>ACT</i> 1r  | GCCAAGATAGAACCACCAATCCAGAC | “ ”                         |
| <i>CIT</i> 2f  | GGTATATGGTGGTATGAGAGGTATTC | “ ”                         |
| <i>CIT</i> 2r  | CTTCTGGTAGTGGTTGTGAGC      | “ ”                         |
| <i>DLD</i> 3f  | TGTCAAGTGGGCGGTGTAG        | “ ”                         |
| <i>DLD</i> 3r  | AGTCATAACCAGTATTGTCCTTCC   | “ ”                         |
