# Supplementary material for: Activation of the yeast Retrograde Response pathway by adaptive laboratory evolution with S-(2-aminoethyl)-L-cysteine reduces ethanol and increases glycerol during winemaking
Source: PubMed Central journal article supplement (PMC11337681; doi:10.1186/s12934-024-02504-z), 2024-08-20

# Additional file 7.

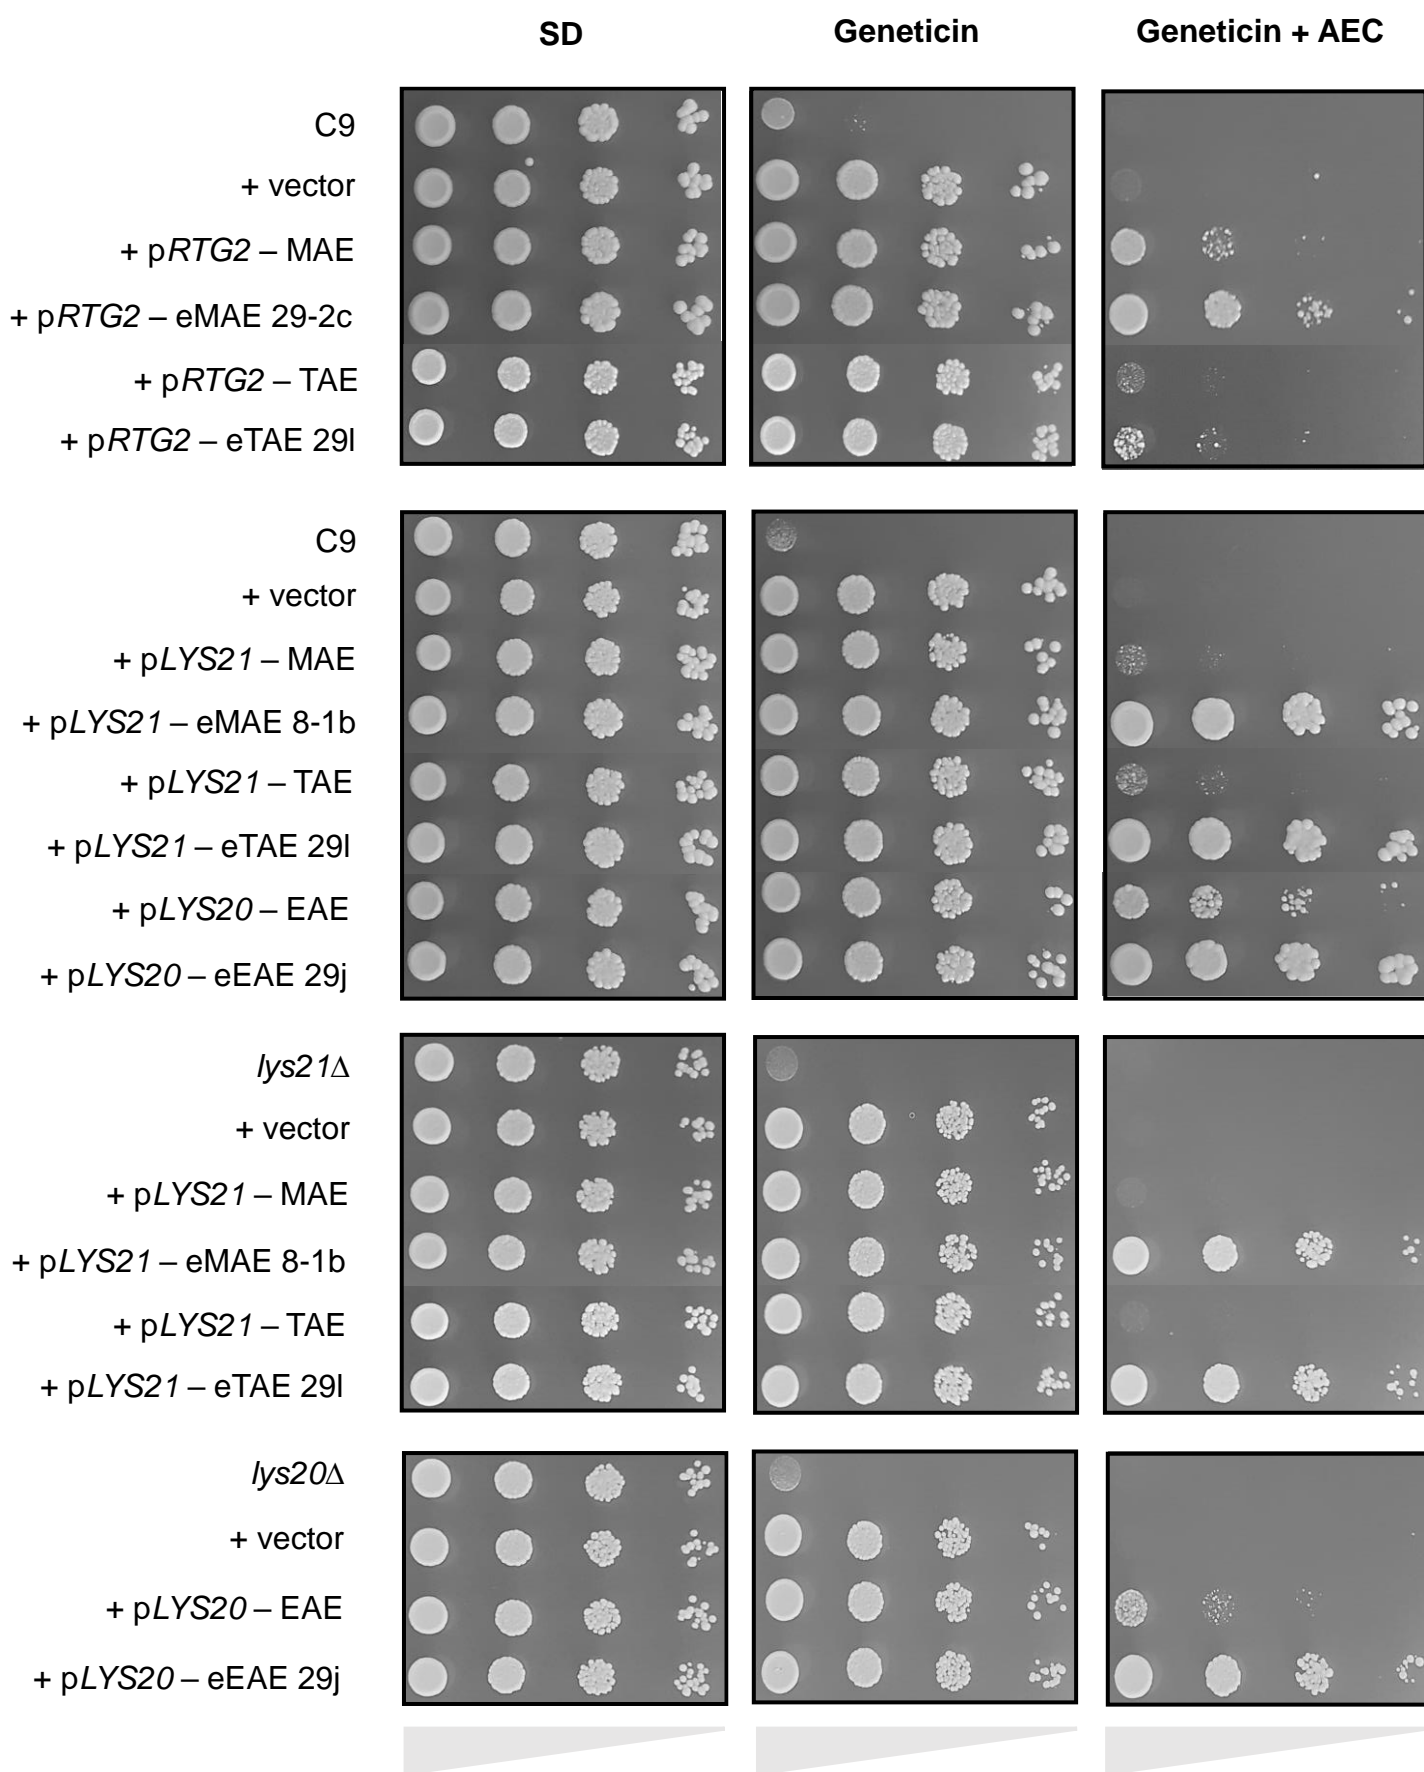

Supplement: 12934_2024_2504_MOESM7_ESM.pdf [file 12934_2024_2504_MOESM7_ESM.pdf]
